# Supplementary material
Source: PubMed Central journal article supplement (PMC3493109)

## SUPPORTING INFORMATION

Glyoxylate carboligase: a unique thiamin diphosphate-dependent enzyme that can cycle between the 4'-aminopyrimidinium and the 1',4'-iminopyrimidine tautomeric forms in the absence of the conserved glutamate.

Natalia Nemeria<sup>2§</sup>, Elad Binshtein<sup>1§</sup>, Hetalben Patel<sup>2</sup>, Anand Balakrishnan<sup>2</sup>, IlanVered<sup>1</sup>, Boaz Shaanan<sup>1</sup>, Ze'ev Barak<sup>1</sup>, David Chipman<sup>1\*</sup>, Frank Jordan<sup>2\*</sup>

<sup>1</sup> Department of Life Sciences, Ben-Gurion University, POB 653, Beer-Sheva 84105, Israel

<sup>2</sup> Department of Chemistry, Rutgers University, 73 Warren Street, Newark, NJ 07102 USA

<sup>§</sup> Both authors contributed equally to this work.

\* To whom correspondence shall be addressed: [chipman@bgu.ac.il](mailto:chipman@bgu.ac.il) , Phone: [\[+972\]-8-647 9212](tel:+972-8-647-9212)

[frjordan@newark.rutgers.edu](mailto:frjordan@newark.rutgers.edu), Phone: 1 973-353-5470, Fax: 1 973-353-1264 (FJ)

† This work was supported by U.S. - Israel Binational Science Foundation Grant 2007-129 (to BS, DMC and FJ) and NIH grant GM050380 to FJ.

*Running title:* Stabilization of a rare thiamin tautomer on glyoxylate carboligase

**Figure S1.** Reaction of GCL with glyoxylate monitored by CD. (Top) Near-UV CD spectra of GCL titrated by glyoxylate. The GCL (1.5 mg/mL, concentration of active centers = 23  $\mu$ M) in 0.1 M  $\text{KH}_2\text{PO}_4$  (pH 7.6) containing 0.5 mM ThDP, 2.5 mM  $\text{MgCl}_2$ , 1.0 mM DTT, 10  $\mu$ M FAD and 1% glycerol was titrated with glyoxylate (0.010–2 mM). Spectra were recorded at 5  $^\circ\text{C}$ . (Bottom) Time course of 1',4'-iminoglycolylThDP formation on GCL. The GCL (46  $\mu$ M concentration of active centers) in the buffer as in Top in one syringe was mixed at 6  $^\circ\text{C}$  with an equal volume of 20  $\mu$ M glyoxylate in the second syringe. The data points were collected for 20 s and were fitted to a double exponential equation [ $\text{CD}_{302-304}(t) = \text{CD}_1 e^{-k_1 t} + \text{CD}_2 e^{-k_2 t} + c$ ].

**Figure S2.** Time-dependent formation of (*S*)-acetolactate by I393A GCL. The I393A GCL (2.5 mg/ml, concentration of active centers = 38.6  $\mu$ M) in 0.1 M  $\text{KH}_2\text{PO}_4$  (pH 7.6) containing 5 mM  $\text{MgCl}_2$  and 0.5 mM ThDP was titrated by pyruvate (0.020 - 4.0 mM) at 4  $^\circ\text{C}$ . On addition of 4 mM pyruvate, temperature was raised to 25  $^\circ\text{C}$  and time-dependent formation of (*S*)-acetolactate was recorded. Inset: CD spectrum of (*S*)-acetolactate after protein was removed from the reaction mixture using Ultracel-30K Centrifugal Filter Unit (Millipore).

**Figure S3.** Time-course of acetolactate-ThDP complex formation on V51D/I393A GCL. The V51D/I393A GCL (7.0 mg/mL, concentration of active centers=108  $\mu$ M) in 0.1 M  $\text{KH}_2\text{PO}_4$  (pH 7.6) containing 0.5 mM ThDP, 2.5 mM  $\text{MgCl}_2$ , 1.0 mM DTT, 10  $\mu$ M FAD and 1% glycerol in one syringe was mixed with 1.2 mM pyruvate at 6  $^\circ\text{C}$  in the second syringe. The reaction was monitored for 50 s and data points were fitted to a double exponential as in Figure S1.

Figure S1.

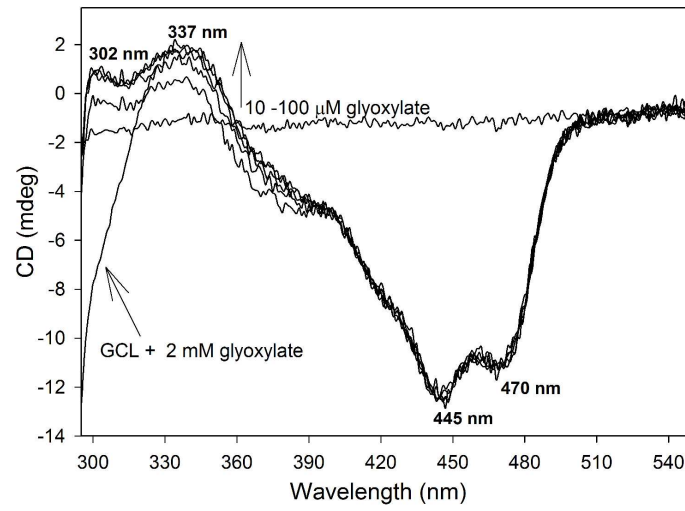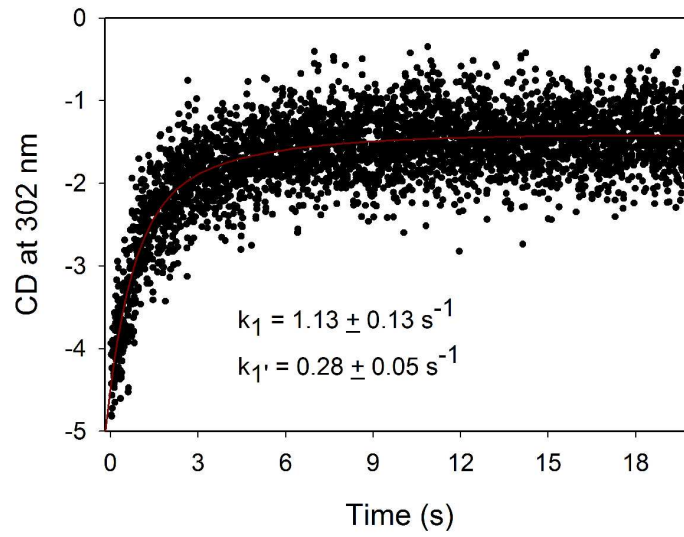

Figure S2.

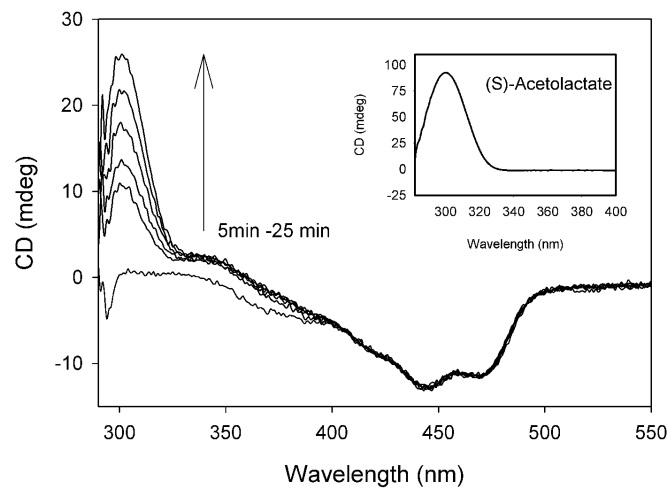

Figure S3.

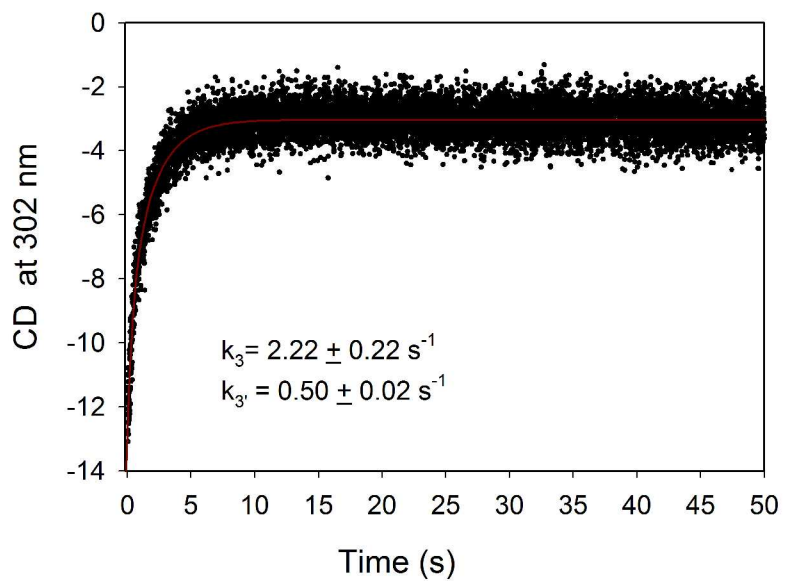

Supplement: NIHMS407992-supplement-1_si_001.pdf [file NIHMS407992-supplement-1_si_001.pdf]
